# Supplementary material for: Impact of lanthanum ion exchange and steaming dealumination on middle distillate production using nanosized Y zeolite catalysts in hydrocracking reactions
Source: Royal Society of Chemistry journal article supplement (doi:10.1039/d4ra04664a), 2024-01-01
Supplement: d4ra04664a1.pdf [file d4ra04664a1.pdf]

## Supplementary information

Impact of lanthanum ion exchange and steaming dealumination on middle distillate production using nanosized Y zeolite catalyst in hydrocracking reaction

Carlos Mendoza<sup>a\*</sup>, Cecilia Manrique<sup>a\*</sup>, Adriana Echavarría<sup>a\*</sup>

<sup>a</sup> Grupo Catalizadores y Adsorbentes, Instituto de Química, Universidad de Antioquia,  
Calle 70 No. 52-21, Medellín, Colombia

Corresponding author. Tel.: +57 604 219 5653; postal address 050010, Calle 67 No 53-108,  
Medellín, Colombia

\*E-mail address: [cjavier.mendoza@udea.edu.co](mailto:cjavier.mendoza@udea.edu.co), [alba.manrique@udea.edu.co](mailto:alba.manrique@udea.edu.co),  
[adriana.echavarria@udea.edu.co](mailto:adriana.echavarria@udea.edu.co)

a)

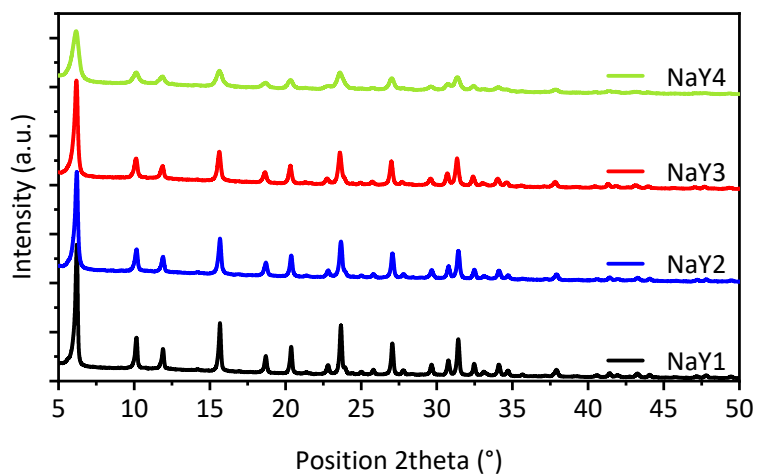

b)

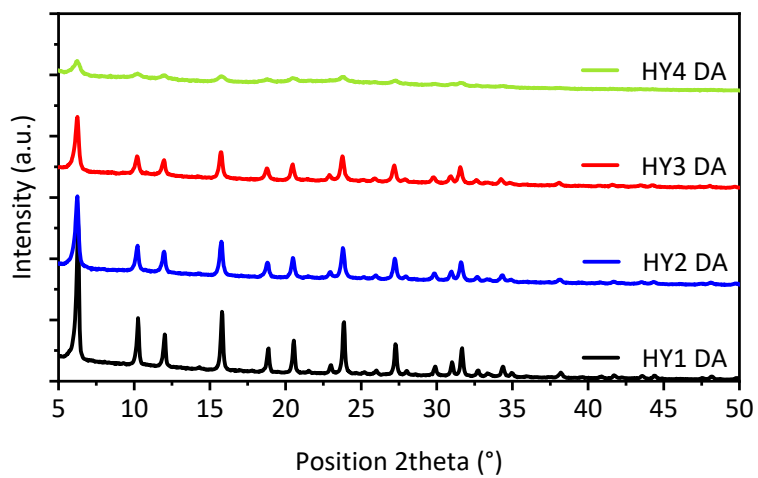

c)

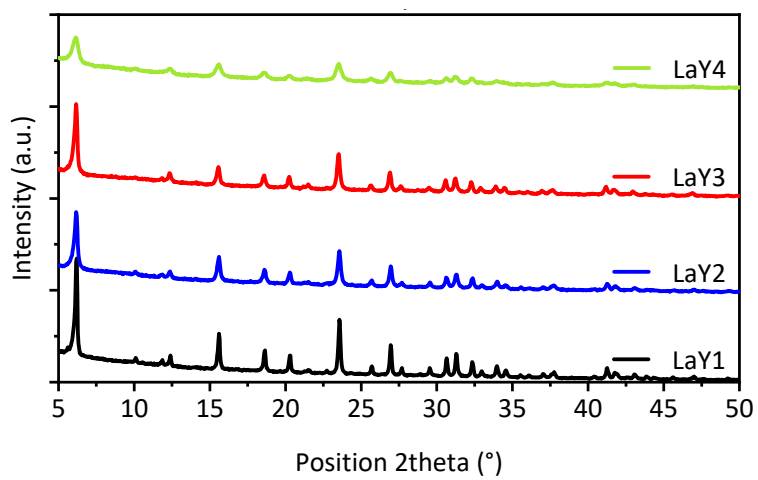

**Figure S1.** XRD patten of synthesized zeolites a) NaY, b) HYDA and c) LaY

NaY1

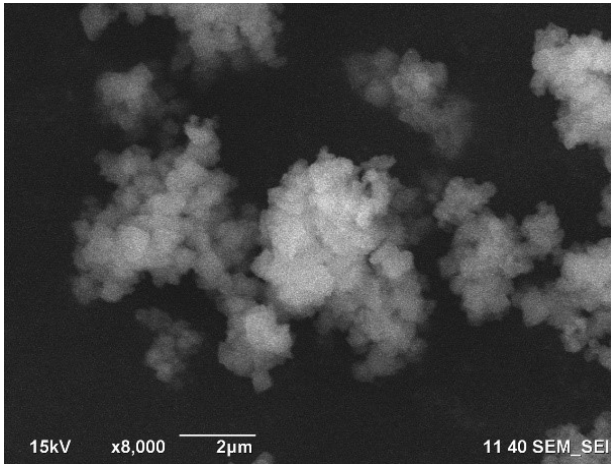

NaY2

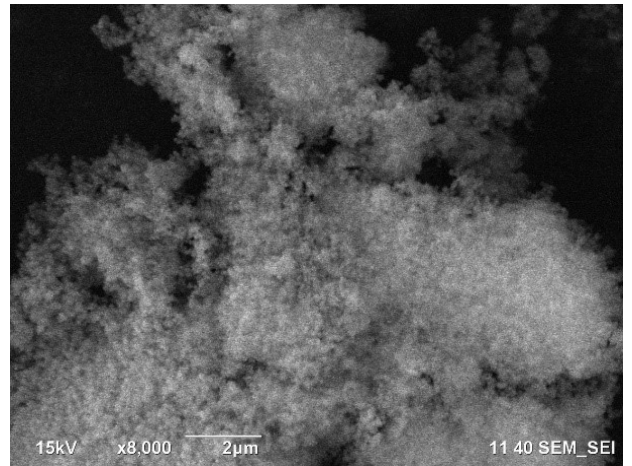

NaY3

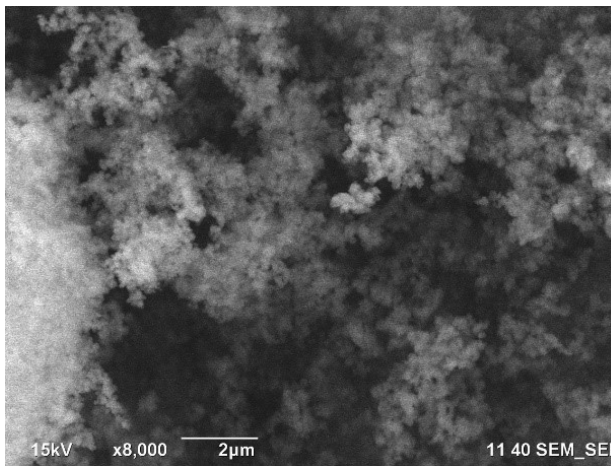

NaY4

**Figure S2.** SEM images of synthesized zeolites NaY1, NY2, NaY3 and NaY4

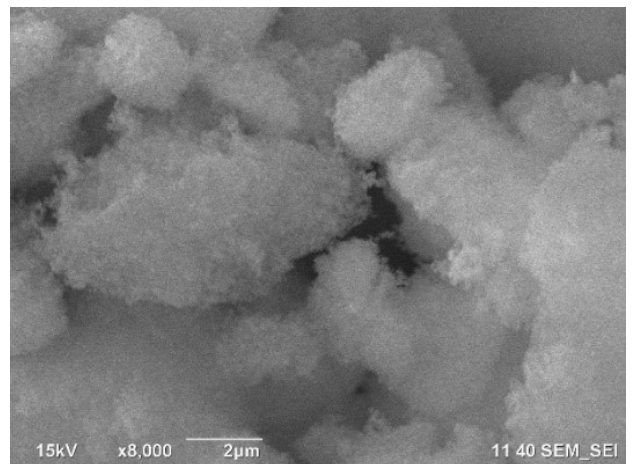

NaY1

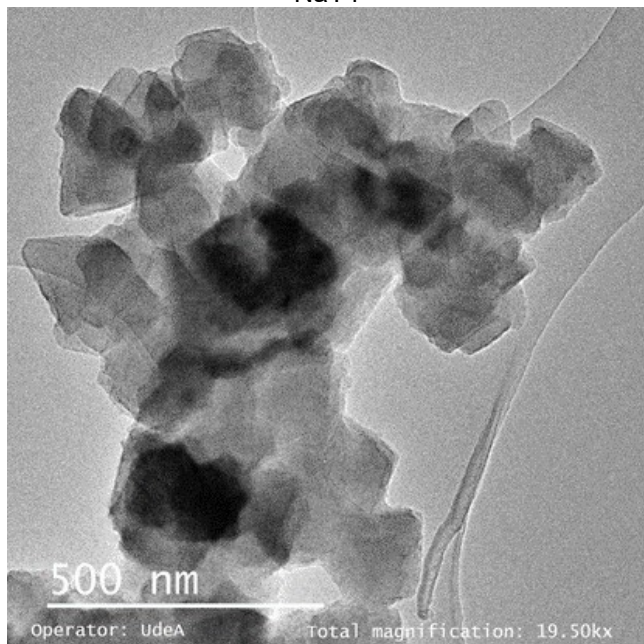

NaY2

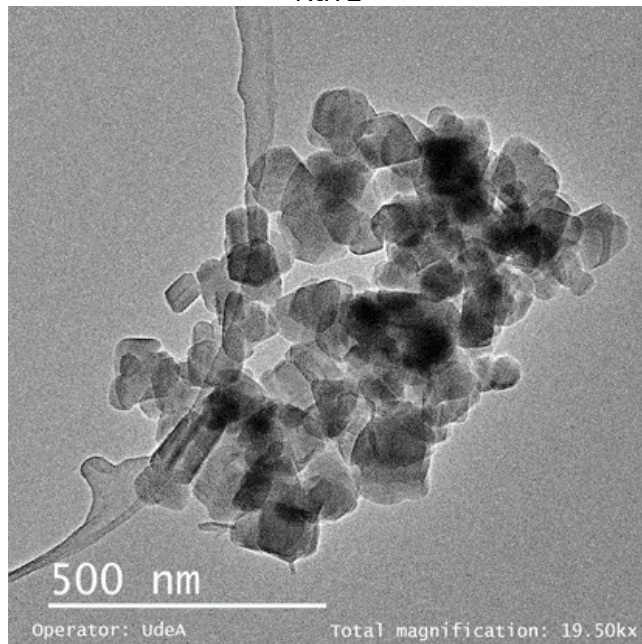

NaY3

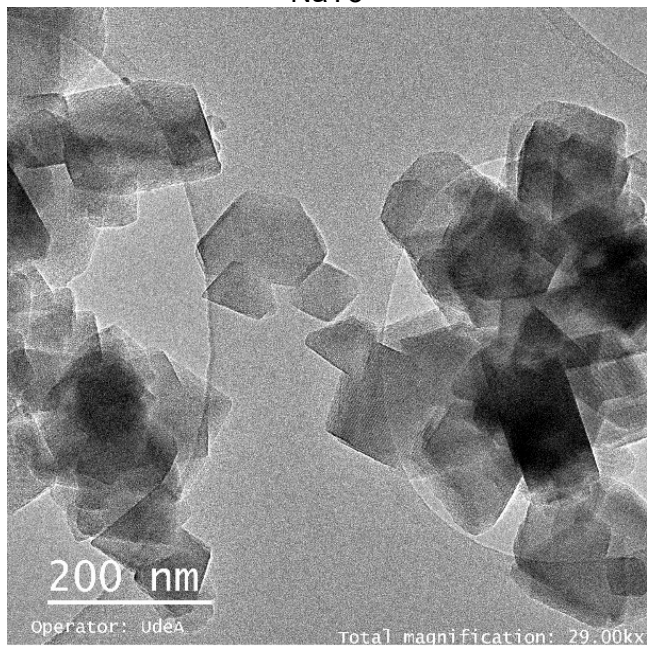

NaY4

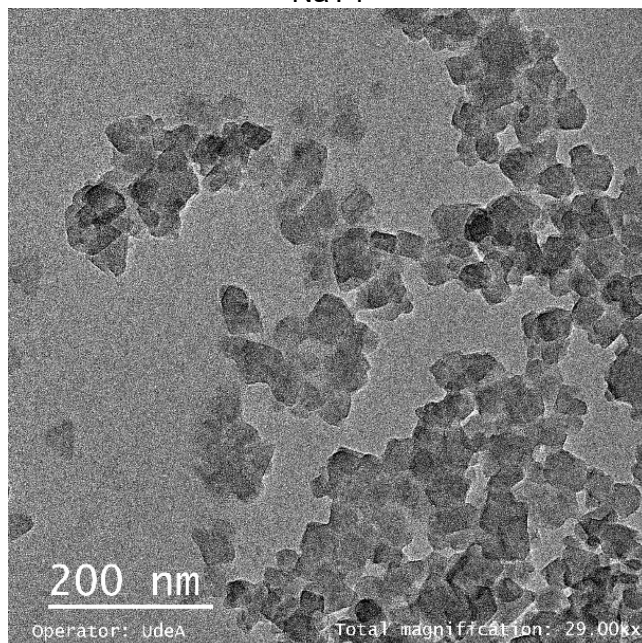

**Figure S3.** TEM images of synthesized zeolites NaY1, NY2, NaY3 and NaY4

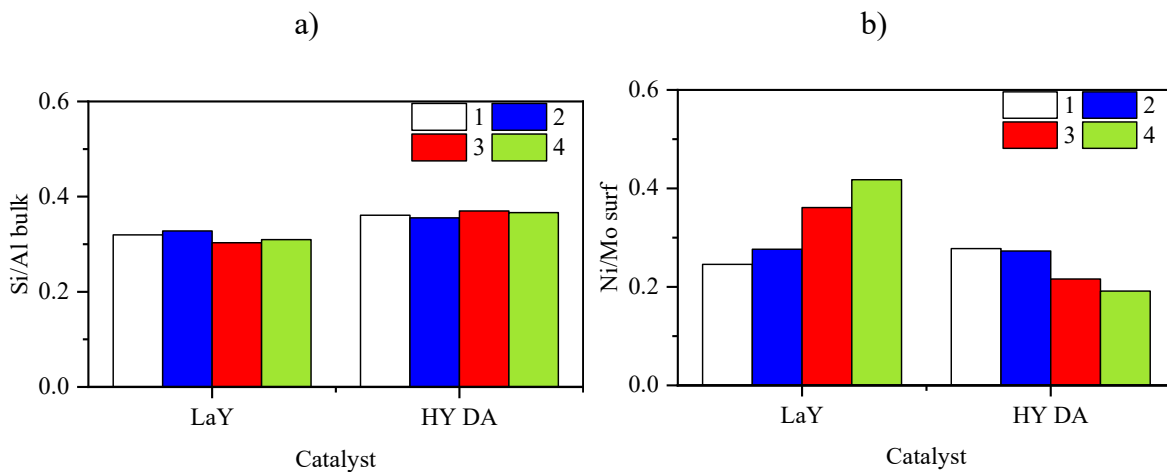

**Figure S4.** a) Bulk Si/Al and b) Ni/Mo ratio of the catalysts based on zeolites LaY and HY DA.

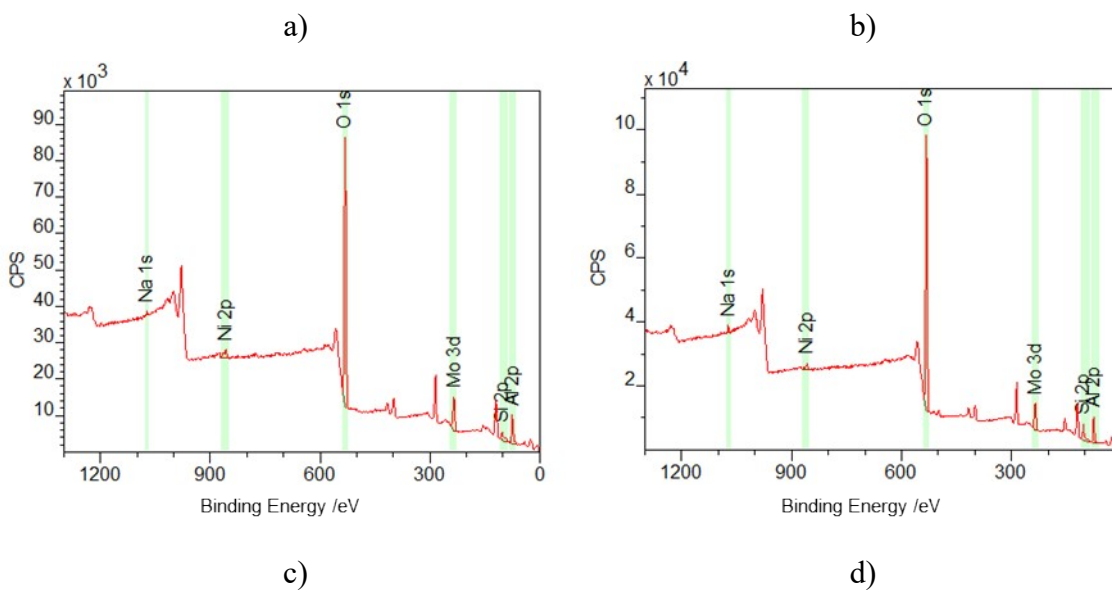

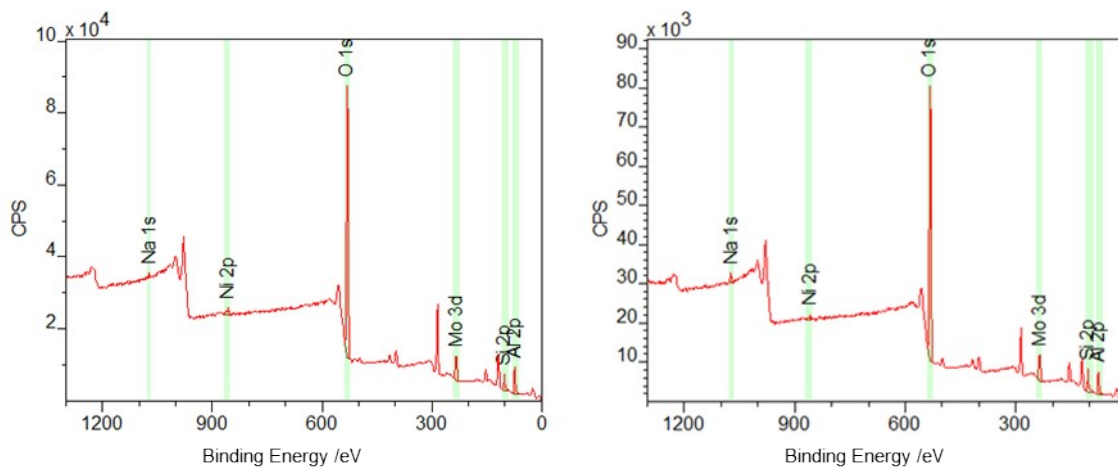

**Figure S5.** XPS spectra of a) HY1 DA, b) HY2 DA, c) HY3 DA, and d) HY4 DA catalysts.

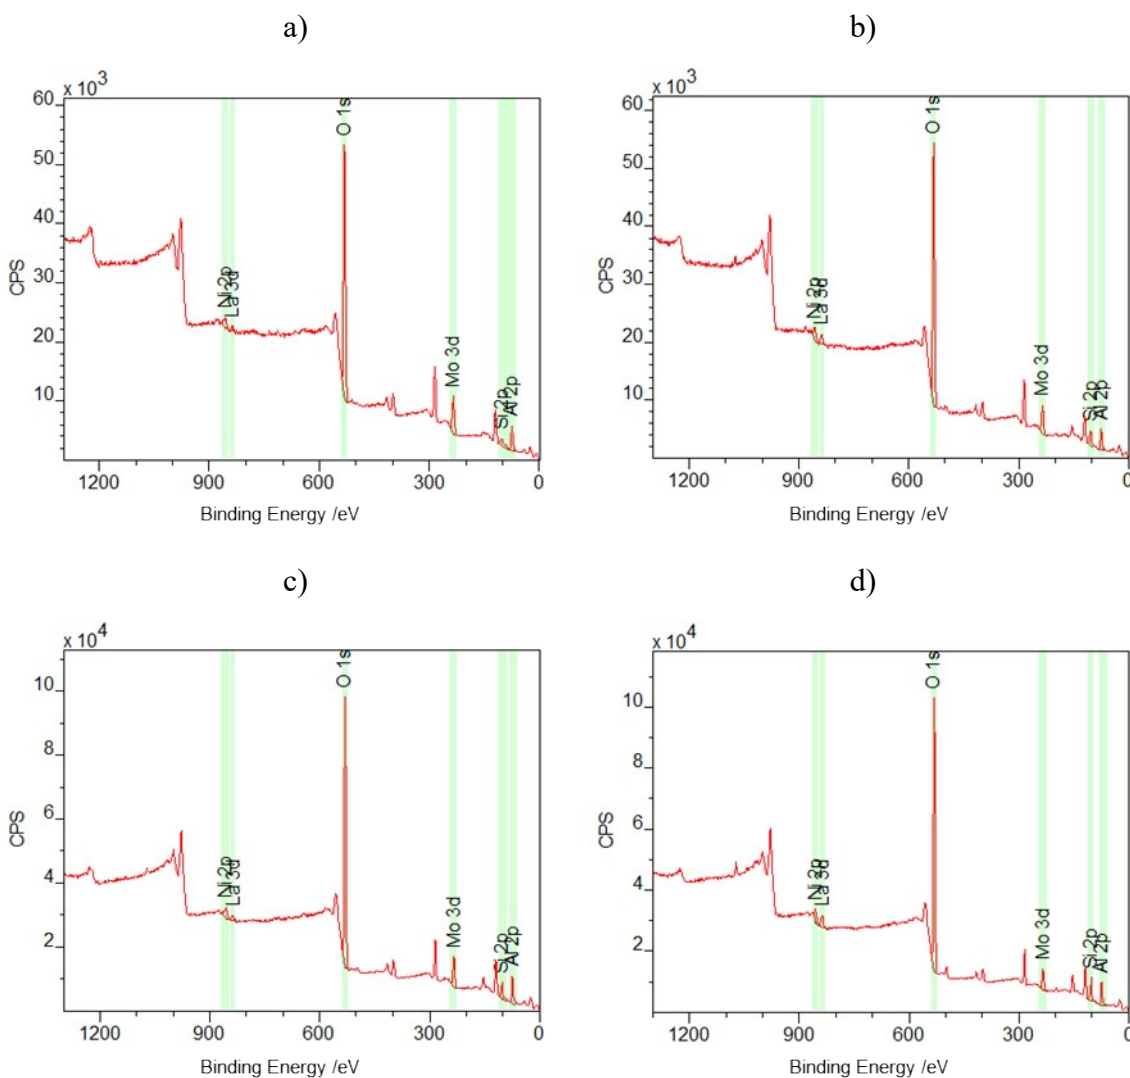

**Figure S6.** XPS spectra of a) LaY1, b) LaY2, c) LaY3, and d) LaY4 catalysts.

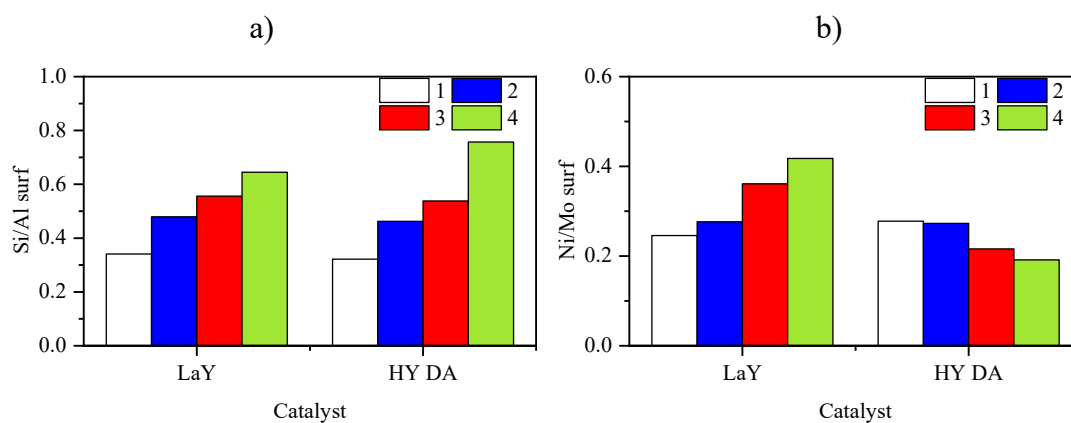

**Figure S7.** Surface Si/Al and Ni/Mo ratio of catalysts based on zeolites a) LaY and b) HY DA.

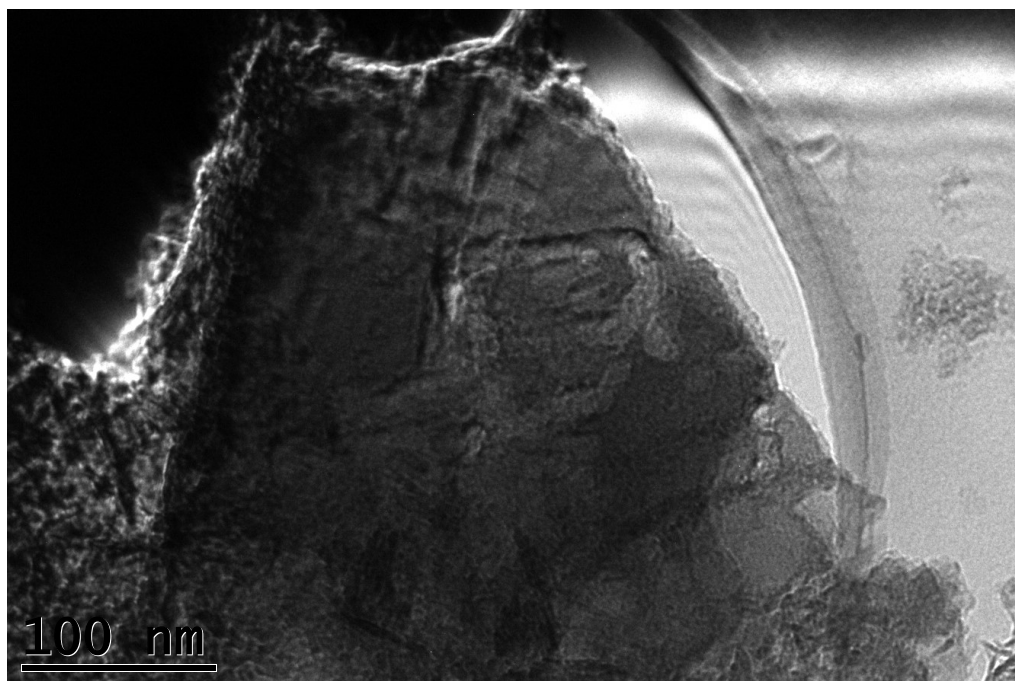

**Figure S8.** Dark-field TEM micrograph with oblique illumination of Cat. HY1 DA.

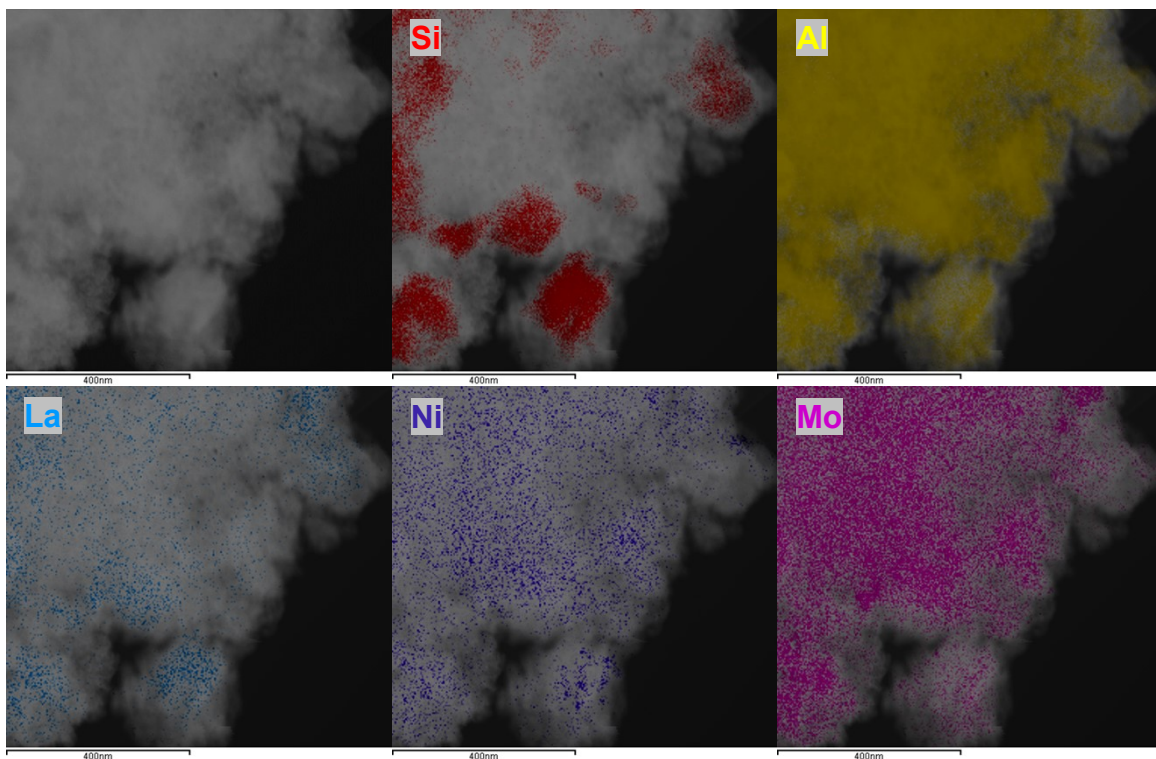

**Figure S9.** Element mapping catalyst NiMo/(LaY1 + Al<sub>2</sub>O<sub>3</sub>)

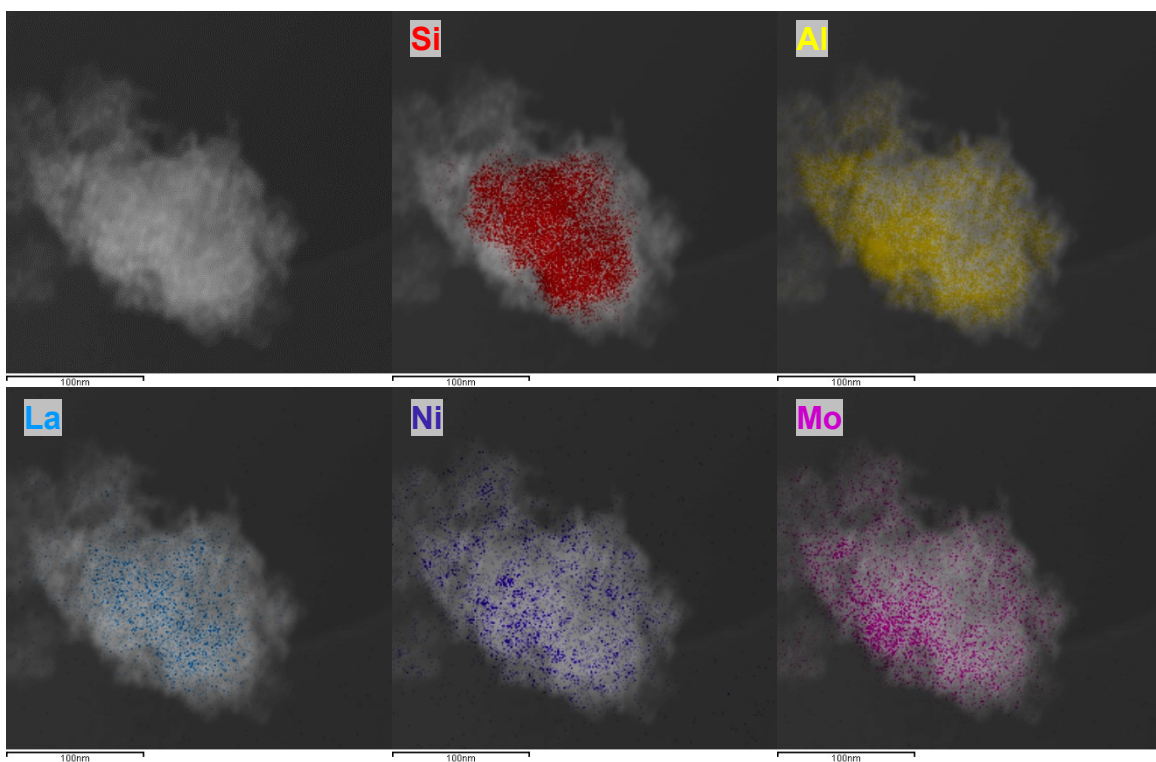

**Figure S10.** Element mapping catalyst NiMo/(LaY2 + Al<sub>2</sub>O<sub>3</sub>)



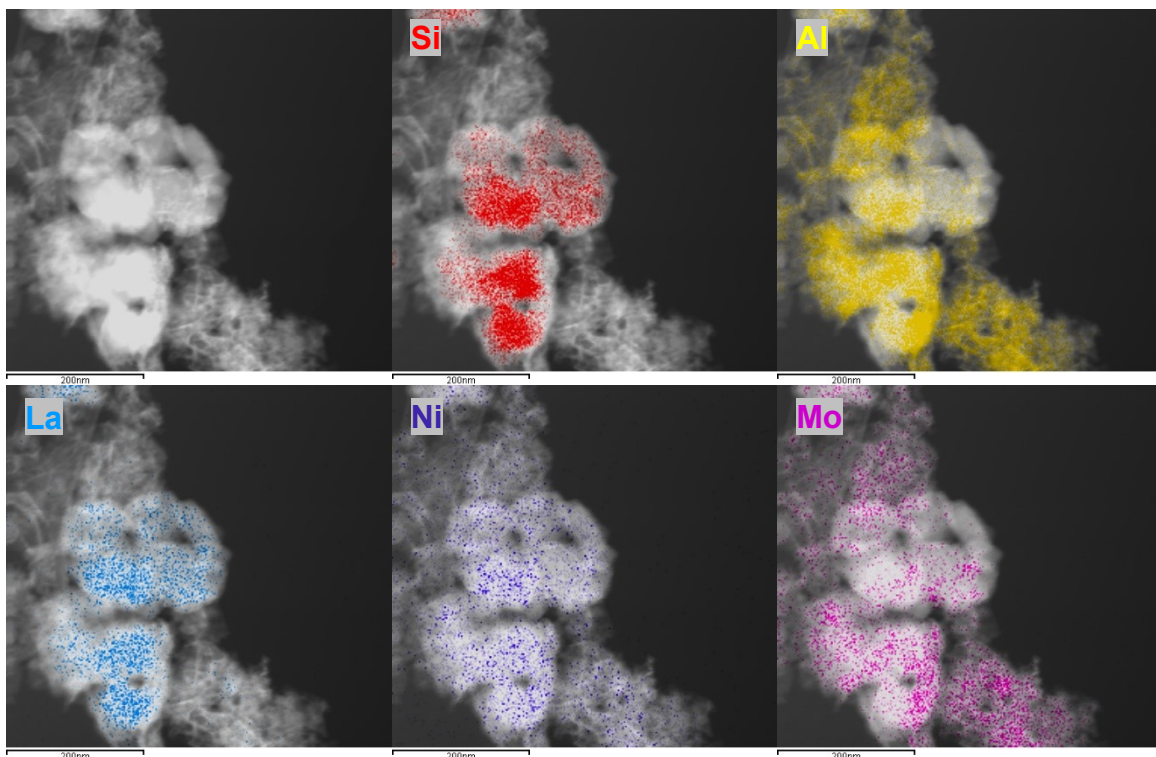

**Figure S11.** Element mapping catalyst NiMo/(LaY<sub>3</sub> + Al<sub>2</sub>O<sub>3</sub>)

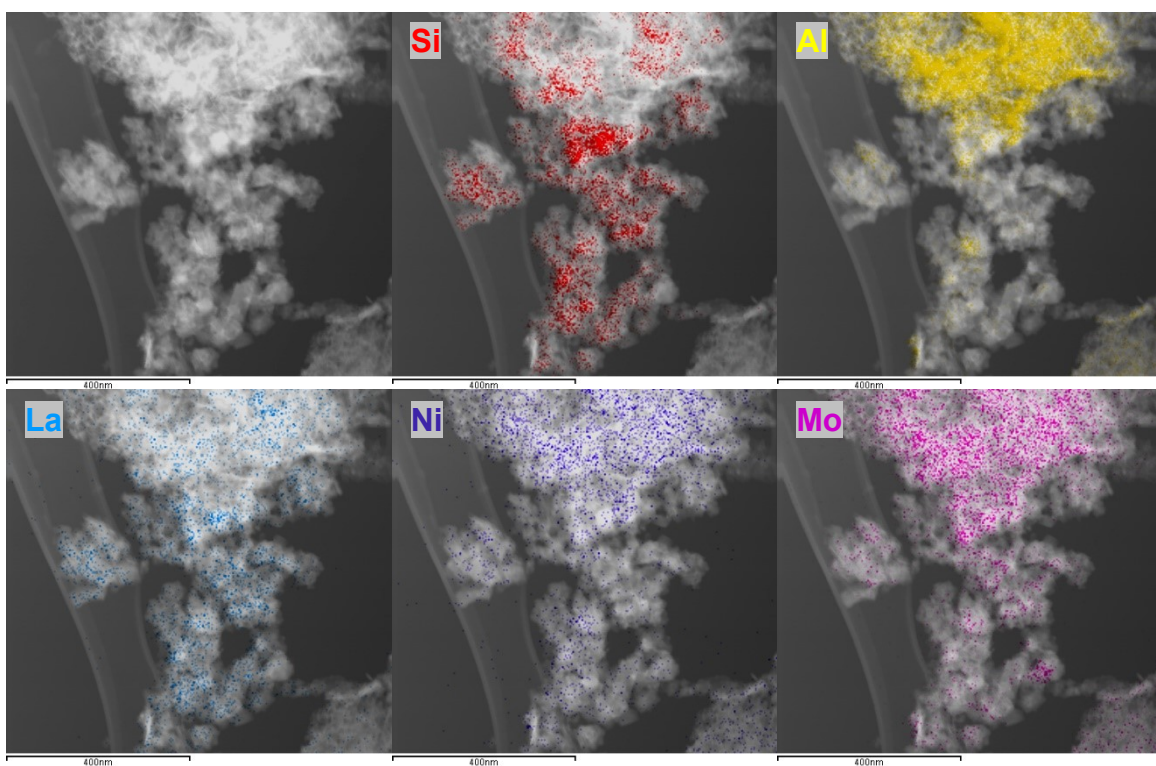

**Figure S12.** Element mapping catalyst NiMo/(LaY<sub>4</sub> + Al<sub>2</sub>O<sub>3</sub>)

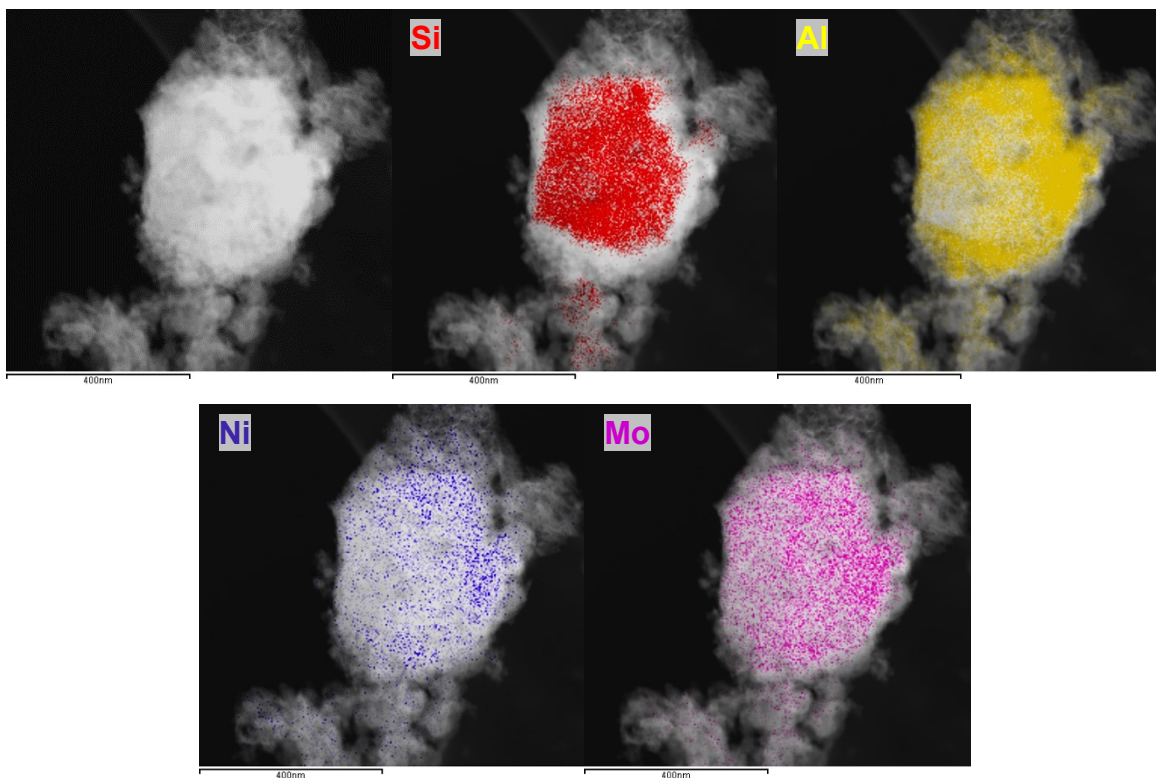

**Figure S13.** Element mapping catalyst NiMo/(HY1 DA+ Al<sub>2</sub>O<sub>3</sub>)

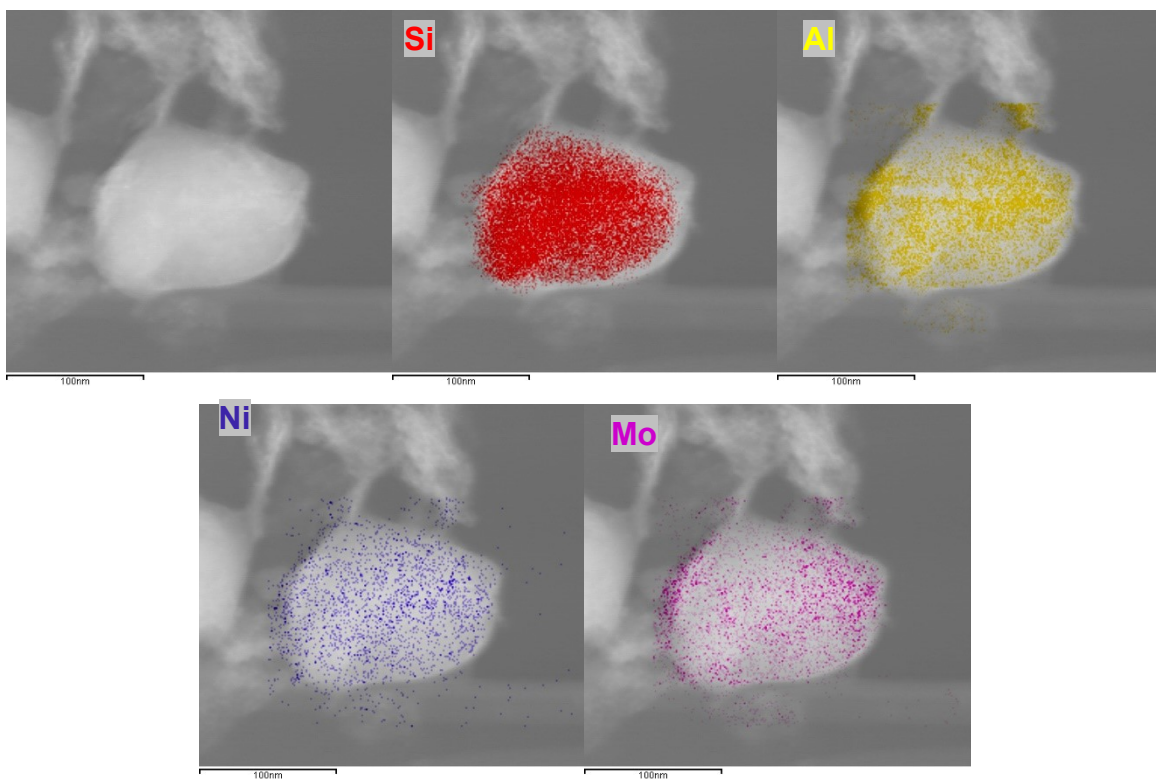

**Figure S14.** Element mapping catalyst NiMo/(HY2 DA+ Al<sub>2</sub>O<sub>3</sub>)

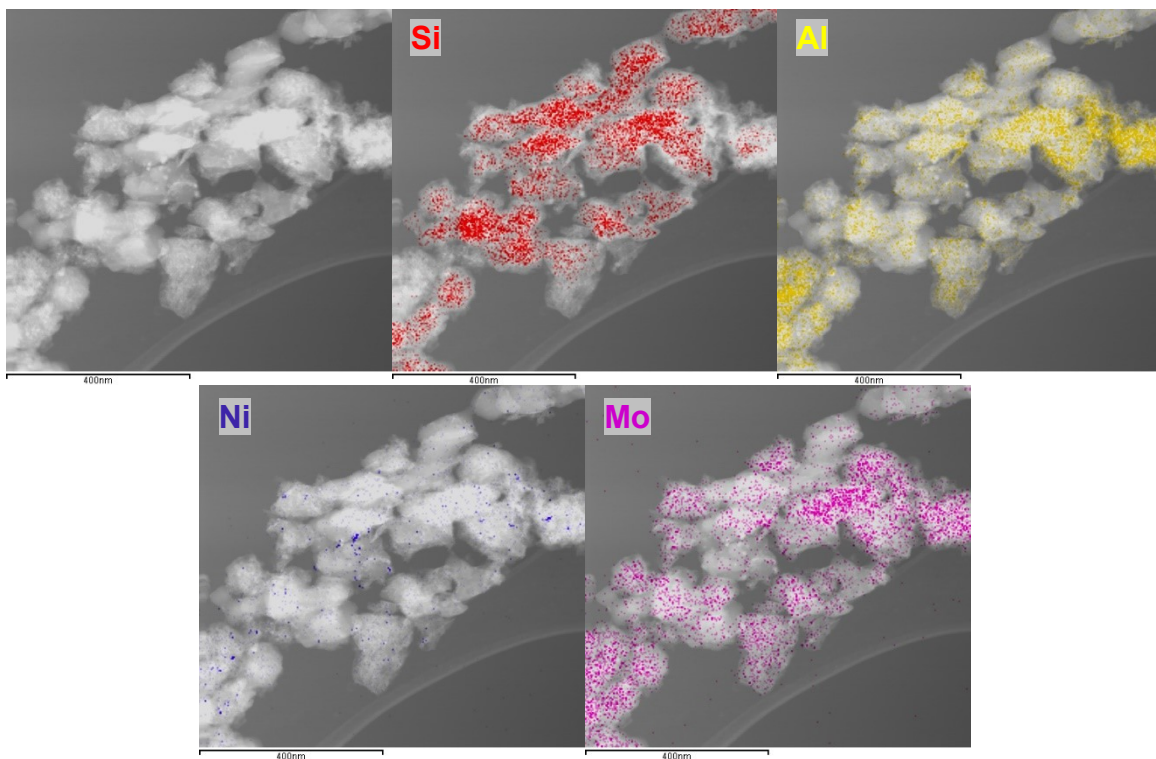

**Figure S15.** Element mapping catalyst NiMo/(HY3 DA+ Al<sub>2</sub>O<sub>3</sub>)

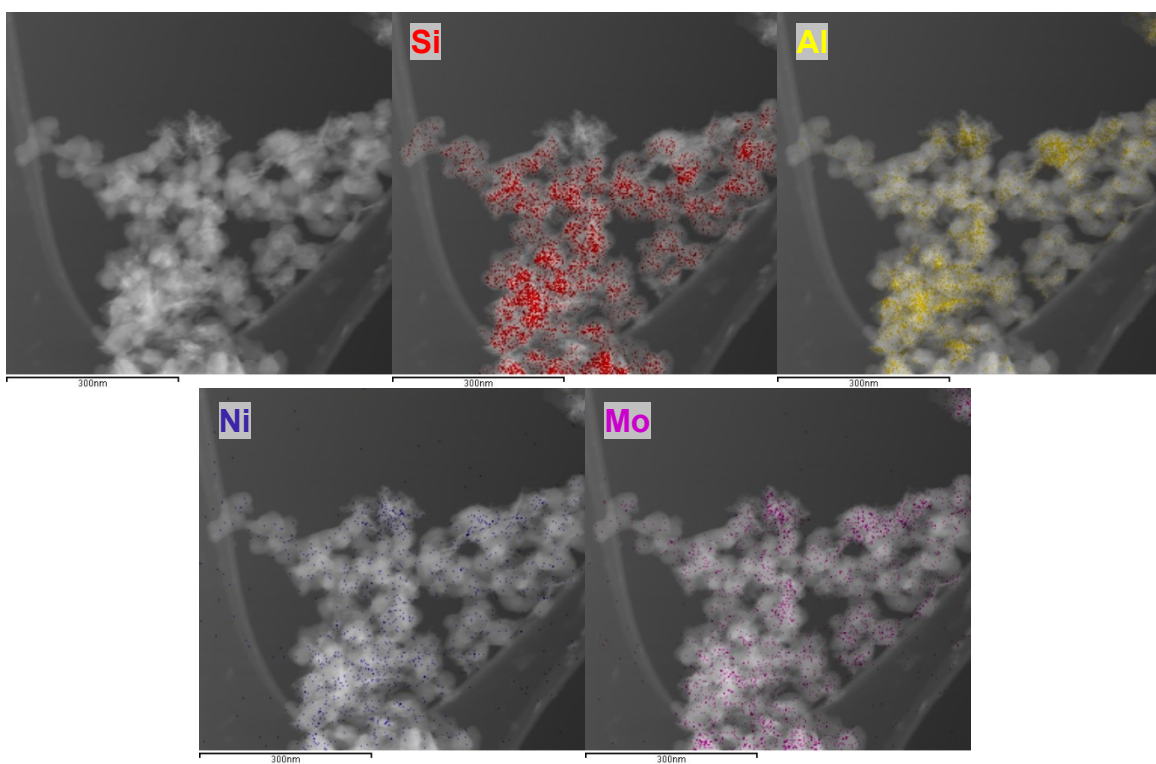

**Figure S16.** Element mapping catalyst NiMo/(HY4 DA+ Al<sub>2</sub>O<sub>3</sub>)

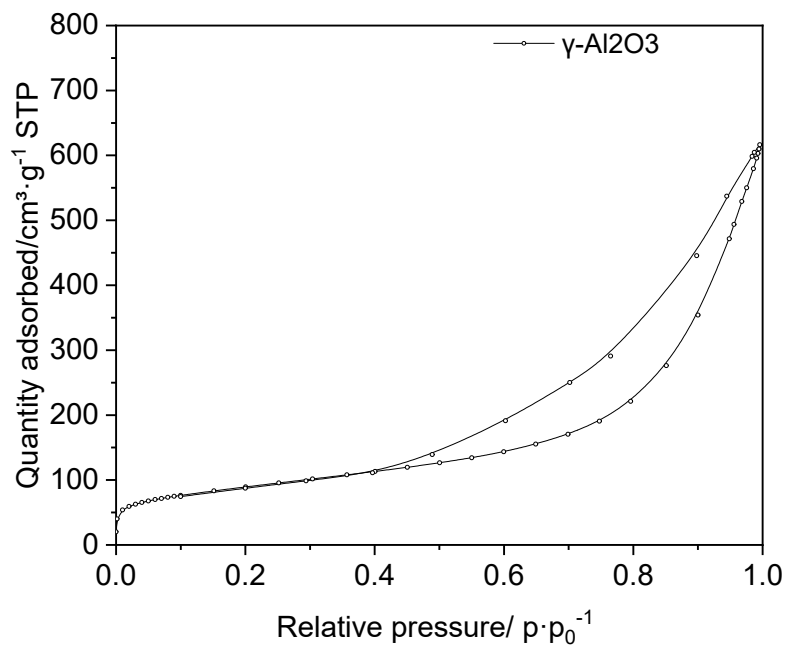

**Figure S17.** N<sub>2</sub> isotherm of  $\gamma$ -Al<sub>2</sub>O<sub>3</sub>.

a)

b)

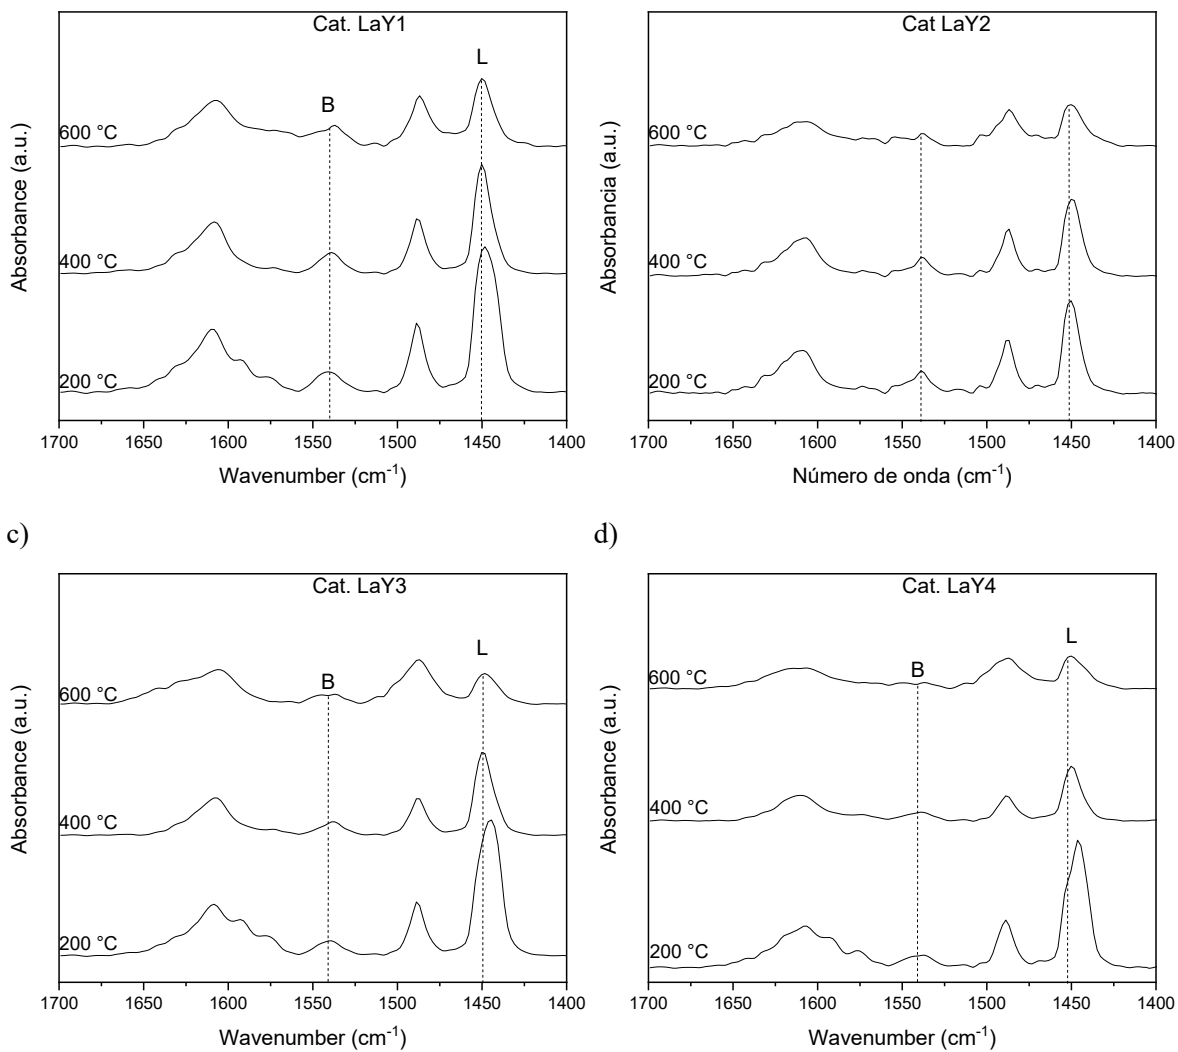

**Figure S18.** IR-Py spectra of a) Cat. LaY1, b) Cat. LaY2, c) Cat. LaY3 and d) Cat. LaY4 from 200 °C to 400 °C

a)

b)

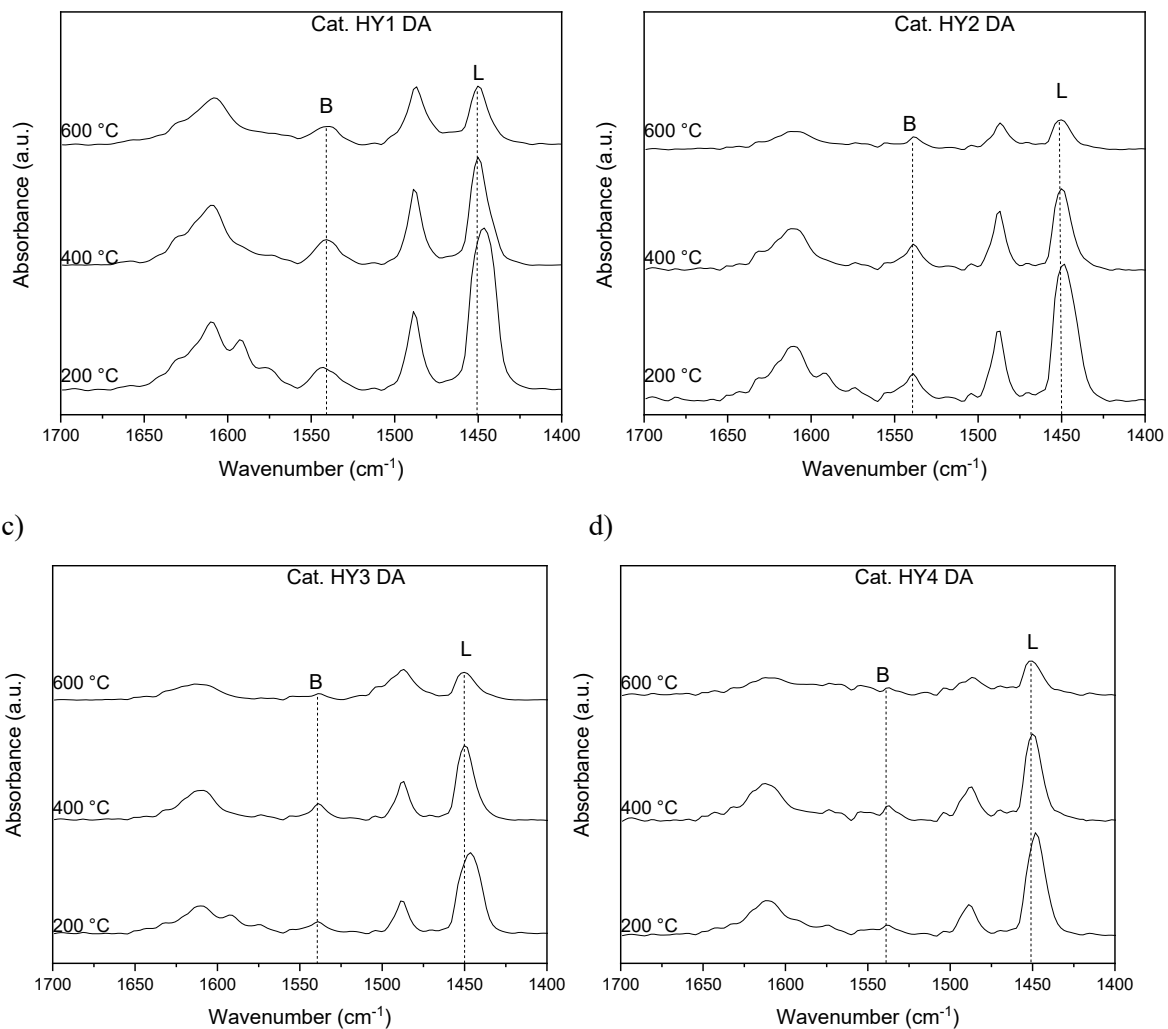

**Figure S19.** IR-Py spectra of a) Cat. HY1 DA, b) Cat. HY2 DA, c) Cat. HY3 DA and d) Cat. HY4 DA from 200 °C to 400 °C.

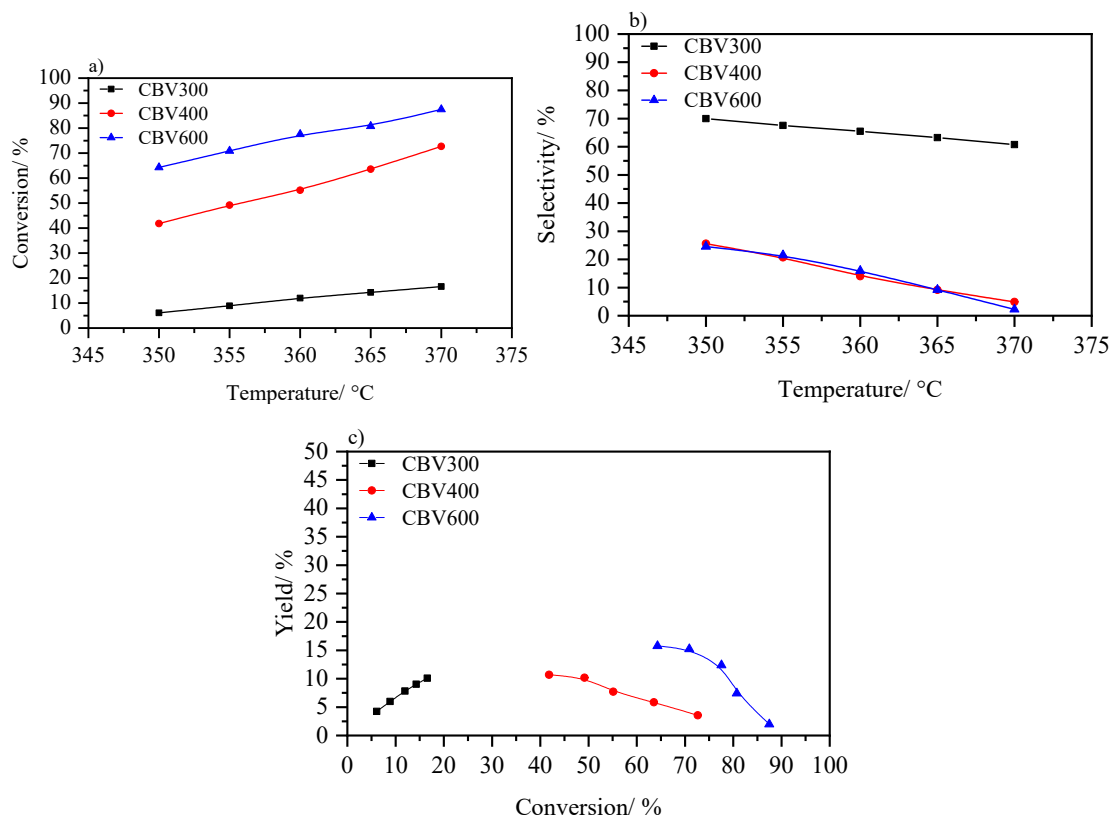

**Figure S20.** a) Conversion vs temperature, b) selectivity to middle distillates vs temperature and c) yield to distillates vs conversion to commercial catalysts CBV300, CBV400, CBV600.

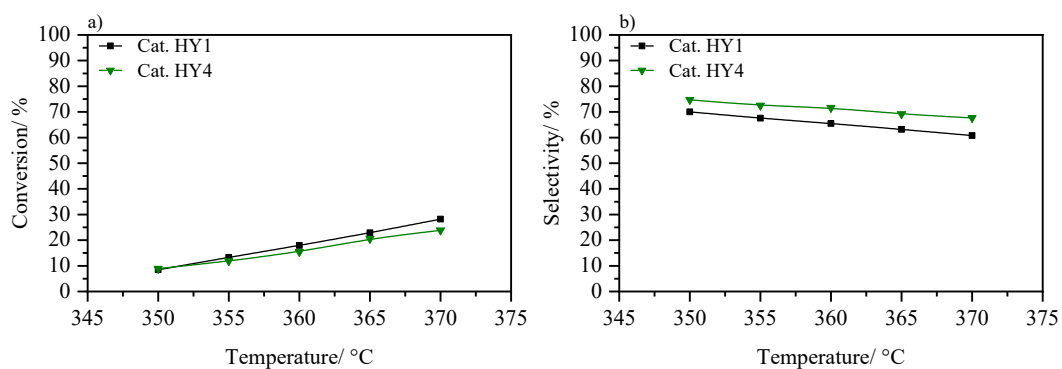

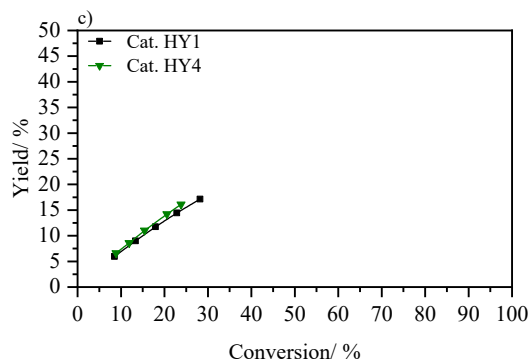

**Figure S21.** a) Conversion vs temperature, b) selectivity to middle distillates vs temperature y c) yield to distillates vs conversion to catalysts HY1 and HY4

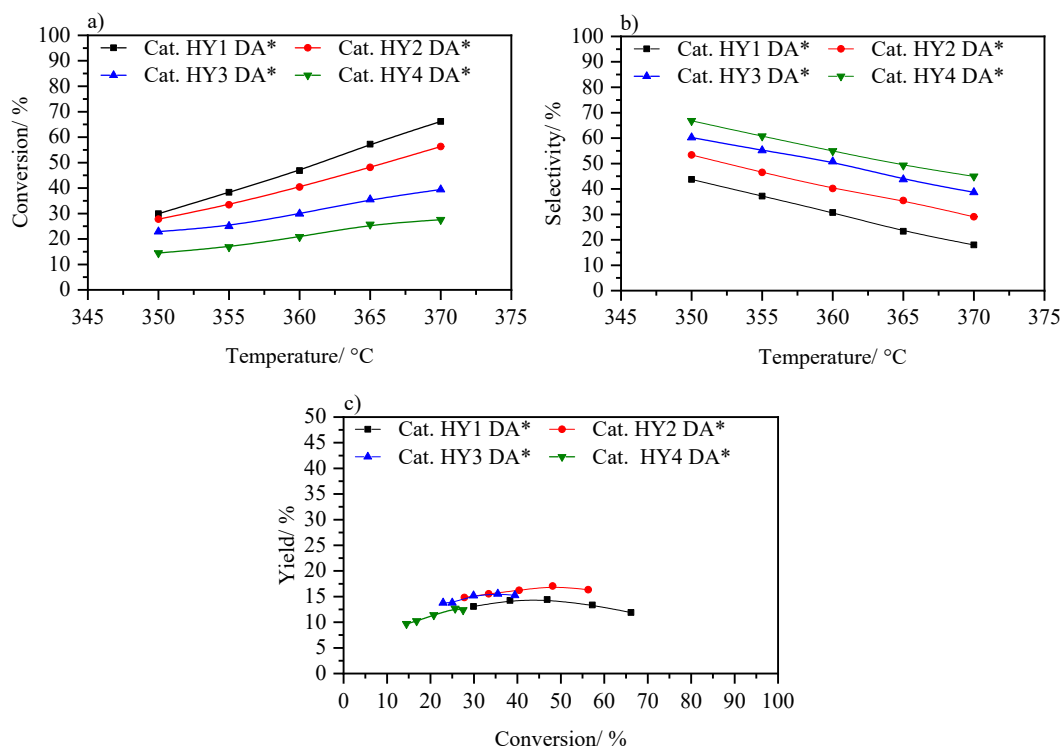

**Figure S22.** a) Conversion vs temperature, b) selectivity to middle distillates vs temperature y c) yield to distillates vs conversion to catalysts HY1 DA\*, HY2 DA\*, HY3 DA\*, and HY4 DA\*.



**Table S1.** Properties of Colombian vacuum gas oil

| Properties                   | Value |
|------------------------------|-------|
| Density /mg·ml <sup>-1</sup> | 0.91  |
| S /ppm                       | 43.0  |
| N /ppm                       | 25.0  |
| Boiling range /°C            |       |
| IBP                          | 277.5 |
| 5 %                          | 357.6 |
| 10 %                         | 374.0 |
| 20 %                         | 393.6 |
| 30 %                         | 409.9 |
| 40 %                         | 424.2 |
| 50 %                         | 437.6 |
| 60 %                         | 451.5 |
| 70 %                         | 466.8 |
| 80 %                         | 482.9 |
| 90 %                         | 502.9 |
| 95 %                         | 518.0 |
| FBP                          | 548.0 |

**Table S2:** Temperature needed to reach maximum yield (wt.%) of middle distillates and corresponding selectivities in different cuts.

| Catalysts   | Temperature (°C) | Hydrocracking conversion (%wt) <sup>a</sup> | Selectivity (%wt)    |                                | Yield (%wt)          |                                |
|-------------|------------------|---------------------------------------------|----------------------|--------------------------------|----------------------|--------------------------------|
|             |                  |                                             | Naphtha <sup>b</sup> | Middle distillate <sup>c</sup> | Naphtha <sup>b</sup> | Middle distillate <sup>c</sup> |
| Cat. LaY1   | 360              | 46                                          | 27                   | 40                             | 12                   | 18                             |
| Cat. LaY2   | 360              | 49                                          | 28                   | 44                             | 14                   | 21                             |
| Cat. LaY3   | 360              | 41                                          | 26                   | 46                             | 10                   | 19                             |
| Cat. LaY4   | 370              | 52                                          | 24                   | 55                             | 12                   | 29                             |
| Cat. HY1 DA | 360              | 41                                          | 26                   | 46                             | 10                   | 19                             |
| Cat. HY2 DA | 360              | 40                                          | 24                   | 40                             | 10                   | 16                             |
| Cat. HY3 DA | 365              | 36                                          | 20                   | 44                             | 7                    | 16                             |
| Cat. HY4 DA | 365              | 26                                          | 13                   | 49                             | 3                    | 13                             |

<sup>a</sup> Conversion % wt at the temperature where the maximum yield of middle distillates is achieved.

<sup>b</sup> Middle distillates: B.P in the range of 180–370 °C.

<sup>c</sup> Naphtha: B.P in the range of IPB–180 °C.
